# Supplementary material
Source: publisher site journal article supplement (https://www.dovepress.com/article/396805)
Supplement: Supplementary file 1 [file get_supplementary_file.php]

**Supplemental Content**

**Supplemental Table 1:** Collinearity check (VIF selection)

**Supplemental Table 2:** Univariate analysis of covariates vs Y= readmission within 3-month

**Supplemental Table 3:** Add covariates to basic model or remove it from full model, check coeff. of X= Hb/RDW-SD

**Supplemental Table 4:** Missing situation for each variable

**Supplemental Table 5:** Comparison of the original data with the data after multiple interpolation of the population descriptions.

**Supplemental Table 6:** Comparison of raw data with data after multiple interpolation for multivariate analysis

**Supplemental Figure 1:** Comparison of smoothed curves between the original

data (0) and the data after multiple interpolation (1-5).

**Supplemental Table 1:** Collinearity check (VIF selection)

|  | Step 1 | Step 2 |
| --- | --- | --- |
| Hb/RDW-SD | 1.4 | 1.4 |
| Occupation | 1 | 1 |
| MSCKD | 1.4 | 1.4 |
| Age | 1.3 | 1.3 |
| Gender | 1.2 | 1.2 |
| SBP | 2.1 | 2.1 |
| DBP | 1.9 | 1.9 |
| Type of HF | 1.1 | 1.1 |
| Diabetes | 1.1 | 1.1 |
| Creatinine | 3.1 | 3.1 |
| Urea | 2.6 | 2.6 |
| GFR | 2.6 | 2.6 |
| Albumin | 1.5 | 1.5 |
| Cystatin | 1.2 | 1.2 |
| WBC | 1.1 | 1.1 |
| RBC | 1.6 | 1.6 |
| Mean corpuscular volume | 337.6 | 1.4 |
| Mean hemoglobin volume | 508.7 | NA |
| Mean hemoglobin concentration | 68.4 | 1.4 |
| High sensitivity troponin | 1.2 | 1.2 |
| Potassium | 1.4 | 1.4 |
| Sodium | 1.2 | 1.2 |
| BNP | 1.3 | 1.3 |
| Alkaline phosphatase | 1.1 | 1.1 |
| Total bilirubin | 1.3 | 1.3 |
| HDL | 1.3 | 1.3 |
| BMI | 1.1 | 1.1 |
| NYHA class | 1 | 1 |
| Myocardial infarction | 1.1 | 1.1 |
| Congestive HF | 1.1 | 1.1 |
| Peripheral vascular disease | 1 | 1 |
| Cerebrovascular disease | 1.1 | 1.1 |
| COPD | 1.1 | 1.1 |
| Presence of LVEF | 1.1 | 1.1 |

Variables removed：Mean hemoglobin volume

**Supplemental Table 2:** Univariate analysis of covariates vs Y= readmission within 3-month

| Covariates | N | term | beta | Se. | exp(beta) | 95%CI Low | 95%CI Upp | p-Value |
| --- | --- | --- | --- | --- | --- | --- | --- | --- |
| Occupation | 1791 | Factor (Occupation)1 | -0.7317 | 0.2240 | 0.4811 | 0.3101 | 0.7463 | 0.0011 |
|  |  | Factor (Occupation)2 | 0.0281 | 0.2362 | 1.0285 | 0.6474 | 1.6339 | 0.9053 |
| Moderate to severe chronic kidney disease | 1814 | Factor (Moderate to severe chronic kidney disease)1 | 0.3857 | 0.1210 | 1.4707 | 1.1601 | 1.8644 | 0.0014 |
| Age | 1816 | Factor (Age)1 | 0.0473 | 0.1189 | 1.0484 | 0.8304 | 1.3235 | 0.6911 |
|  |  | Factor (Age)2 | -0.3358 | 0.1554 | 0.7147 | 0.5271 | 0.9693 | 0.0307 |
| Gender | 1816 | Factor (Gender)1 | 0.0952 | 0.1097 | 1.0999 | 0.8871 | 1.3636 | 0.3855 |
| SBP | 1816 | SBP | -0.0124 | 0.0024 | 0.9877 | 0.9831 | 0.9922 | <0.0001 |
| DBP | 1816 | DBP | -0.0116 | 0.0039 | 0.9885 | 0.9808 | 0.9961 | 0.0033 |
| Type of HF | 1816 | Factor (Type of HF)1 | -0.5526 | 0.1399 | 0.5754 | 0.4375 | 0.7569 | 0.0001 |
|  |  | Factor (Type of HF)2 | -0.3966 | 0.3787 | 0.6726 | 0.3202 | 1.4128 | 0.2949 |
| Diabetes | 1816 | Factor (Diabetes)1 | 0.2958 | 0.1234 | 1.3442 | 1.0553 | 1.7121 | 0.0166 |
| Creatinine | 1795 | Creatinine | 0.0019 | 0.0007 | 1.0019 | 1.0006 | 1.0032 | 0.0049 |
| Urea | 1795 | Urea | 0.0439 | 0.0098 | 1.0449 | 1.0251 | 1.0651 | <0.0001 |
| GFR | 1759 | GFR | -0.0075 | 0.0017 | 0.9925 | 0.9891 | 0.9959 | <0.0001 |
| Albumin | 1727 | Albumin | 0.0121 | 0.0117 | 1.0122 | 0.9893 | 1.0357 | 0.3001 |
| Cystatin | 1779 | Cystatin | 0.0288 | 0.0566 | 1.0292 | 0.9210 | 1.1500 | 0.6116 |
| WBC | 1790 | WBC | 0.0210 | 0.0149 | 1.0212 | 0.9918 | 1.0515 | 0.1590 |
| RBC | 1790 | RBC | -0.0223 | 0.0711 | 0.9780 | 0.8508 | 1.1242 | 0.7543 |
| MCV | 1789 | MCV | -0.0005 | 0.0062 | 0.9995 | 0.9874 | 1.0118 | 0.9387 |
| MCHC | 1790 | MCHC | -0.0042 | 0.0039 | 0.9958 | 0.9883 | 1.0033 | 0.2719 |
| High sensitivity troponin | 1747 | High sensitivity troponin | -0.0657 | 0.0987 | 0.9364 | 0.7716 | 1.1364 | 0.5057 |
| Potassium | 1807 | Potassium | 0.2539 | 0.0770 | 1.2890 | 1.1084 | 1.4991 | 0.0010 |
| Sodium | 1807 | Sodium | -0.0494 | 0.0107 | 0.9518 | 0.9321 | 0.9720 | <0.0001 |
| BNP | 1786 | BNP | 0.0001 | 0.0000 | 1.0001 | 1.0001 | 1.0002 | 0.0010 |
| Alkaline phosphatase | 1727 | Alkaline phosphatase | 0.0013 | 0.0014 | 1.0013 | 0.9985 | 1.0042 | 0.3636 |
| Total bilirubin | 1727 | Total bilirubin | 0.0101 | 0.0036 | 1.0101 | 1.0030 | 1.0173 | 0.0054 |
| HDL | 1639 | HDL | -0.1593 | 0.1642 | 0.8527 | 0.6181 | 1.1764 | 0.3318 |
| BMI | 1816 | BMI | -0.0224 | 0.0144 | 0.9778 | 0.9507 | 1.0057 | 0.1183 |
| NYHA class | 1816 | Factor (NYHA class)1 | 0.3610 | 0.1189 | 1.4347 | 1.1366 | 1.8112 | 0.0024 |
|  |  | Factor (NYHA class)2 | -0.3866 | 0.1649 | 0.6794 | 0.4918 | 0.9386 | 0.0191 |
| Myocardial infarction | 1816 | Factor (Myocardial infarction)1 | -0.1298 | 0.2091 | 0.8782 | 0.5829 | 1.3233 | 0.5347 |
| Congestive HF | 1816 | Factor (Congestive HF)1 | -0.2018 | 0.2029 | 0.8172 | 0.5490 | 1.2164 | 0.3199 |
| Peripheral vascular disease | 1816 | Factor (Peripheral vascular disease)1 | 0.0433 | 0.2347 | 1.0443 | 0.6593 | 1.6542 | 0.8535 |
| Cerebrovascular disease | 1816 | factor (Cerebrovascular disease)1 | 0.0293 | 0.2040 | 1.0298 | 0.6903 | 1.5361 | 0.8857 |
| COPD | 1816 | Factor (COPD)1 | 0.1402 | 0.1612 | 1.1505 | 0.8387 | 1.5781 | 0.3846 |
| Presence of LVEF | 1816 | Factor (LVEF_CLASS)1 | -0.0545 | 0.1168 | 0.9470 | 0.7533 | 1.1905 | 0.6408 |

**Supplemental Table 3:** Add covariates to basic model or remove it from full model, check coeff. of X= Hb/RDW-SD

|  |  | Basic model | Full model |  |
| --- | --- | --- | --- | --- |
| Covariate | +/- term | Hb/RDW-SD | Hb/RDW-SD | Selected |
|  | Initial X coeff. | -0.3152 | -0.3381 |  |
| Occupation | Factor (OCCUPATION) | -0.3126 | -0.3277 |  |
| Moderate to severe chronic kidney disease | Factor (Moderate to severe chronic kidney disease) | -0.2882 | -0.3360 |  |
| Age | Factor (Age) | -0.2806 * | -0.3635 | Yes |
| Gender | Factor (Gender) | -0.3193 | -0.3261 |  |
| SBP | SBP | -0.3201 | -0.2823 * | Yes |
| DBP | DBP | -0.2833 * | -0.3127 | Yes |
| Type of HF | factor (Type of HF) | -0.2894 | -0.3604 |  |
| Diabetes | factor (Diabetes) | -0.3107 | -0.3326 |  |
| Creatinine | Creatinine | -0.2683 * | -0.3205 | Yes |
| Urea | Urea | -0.1979 * | -0.3482 | Yes |
| GFR | GFR | -0.2186 * | -0.3403 | Yes |
| Albumin | Albumin | -0.4081 * | -0.2433 * | Yes |
| Cystatin | Cystatin | -0.3210 | -0.3379 |  |
| WBC | WBC | -0.3186 | -0.3324 |  |
| RBC | RBC | -0.3156 | -0.3379 |  |
| MCV | MCV | -0.3158 | -0.3284 |  |
| MCHC | MCHC | -0.3121 | -0.3418 |  |
| High sensitivity troponin | High sensitivity troponin | -0.3161 | -0.3478 |  |
| Potassium | Potassium | -0.2757 * | -0.3375 | Yes |
| Sodium | Sodium | -0.3171 | -0.3102 |  |
| BNP | BNP | -0.2936 | -0.3372 |  |
| Alkaline phosphatase | Alkaline phosphatase | -0.3086 | -0.3389 |  |
| Total bilirubin | Total bilirubin | -0.3393 | -0.3383 |  |
| HDL | HDL | -0.3080 | -0.3357 |  |
| BMI | BMI | -0.3108 | -0.3353 |  |
| NYHA class | Factor (NYHA class) | -0.2891 | -0.3593 |  |
| Myocardial infarction | Factor (Myocardial infarction) | -0.3149 | -0.3390 |  |
| Congestive HF | Factor (Congestive HF) | -0.3151 | -0.3404 |  |
| Peripheral vascular disease | Factor (Peripheral vascular disease) | -0.3145 | -0.3400 |  |
| Cerebrovascular disease | Factor (Cerebrovascular disease) | -0.3138 | -0.3404 |  |
| COPD | Factor (COPD) | -0.3197 | -0.3370 |  |
| Presence of LVEF | Factor (Presence of LVEF) | -0.3152 | -0.3381 |  |

* >10% change compared to initial X coeff.

**Selected covariates from Supplemental Table 1-3**

| Y | X | Selected covariates |
| --- | --- | --- |
| Readmission within 3-month | Hb/RDW-SD | age; occupation; moderate to severe chronic kidney disease; SBP; DBP; type of HF; diabetes; creatinine; urea; GFR; albumin; potassium; sodium; BNP; total bilirubin; NYHA class |

**Supplemental Table 4:** Missing situation for each variable

| Variables | non-missing | missing |
| --- | --- | --- |
| Occupation | 1791 | 25 |
| MSCKD | 1814 | 2 |
| Age | 1816 | 0 |
| Gender | 1816 | 0 |
| SBP | 1816 | 0 |
| DBP | 1816 | 0 |
| Type of HF | 1816 | 0 |
| Diabetes | 1816 | 0 |
| Creatinine | 1795 | 21 |
| Urea | 1795 | 21 |
| GFR | 1759 | 57 |
| RDW-SD | 1791 | 25 |
| Hemoglobin | 1793 | 23 |
| Albumin | 1727 | 89 |
| Hb/RDW-SD | 1790 | 26 |
| Cystatin | 1779 | 37 |
| WBC | 1790 | 26 |
| RBC | 1790 | 26 |
| MCV | 1789 | 27 |
| MCH | 1789 | 27 |
| MCHC | 1790 | 26 |
| High sensitivity troponin | 1747 | 69 |
| Potassium | 1807 | 9 |
| Sodium | 1807 | 9 |
| BNP | 1786 | 30 |
| Alkaline phosphatase | 1727 | 89 |
| Total bilirubin | 1727 | 89 |
| BMI | 1816 | 0 |
| NYHA class | 1816 | 0 |
| Myocardial infarction | 1816 | 0 |
| Congestive HF | 1816 | 0 |
| Peripheral vascular disease | 1816 | 0 |
| Cerebrovascular disease | 1816 | 0 |
| COPD | 1816 | 0 |
| Readmission within 3-month | 1816 | 0 |
| LVEF | 575 | 1241 |

**Supplemental Table 5:** Comparison of the original data with the data after multiple interpolation of the population descriptions.

| MI item | Pre-imputation | Pro-imputation 1 | Pro-imputation 2 | Pro-imputation 3 | Pro-imputation 4 | Pro-imputation 5 | p-Value |
| --- | --- | --- | --- | --- | --- | --- | --- |
| N | 1816 | 1816 | 1816 | 1816 | 1816 | 1816 |  |
| SBP | 132.02 ± 23.86 | 132.02 ± 23.86 | 132.02 ± 23.86 | 132.02 ± 23.86 | 132.02 ± 23.86 | 132.02 ± 23.86 | 1.000 |
| DBP | 76.63 ± 14.15 | 76.63 ± 14.15 | 76.63 ± 14.15 | 76.63 ± 14.15 | 76.63 ± 14.15 | 76.63 ± 14.15 | 1.000 |
| Creatinine | 109.99 ± 76.31 | 109.83 ± 76.02 | 109.81 ± 76.03 | 109.84 ± 76.04 | 109.82 ± 76.03 | 109.83 ± 76.06 | 1.000 |
| Urea | 9.56 ± 5.26 | 9.55 ± 5.25 | 9.57 ± 5.26 | 9.56 ± 5.26 | 9.54 ± 5.24 | 9.56 ± 5.26 | 1.000 |
| GFR | 65.58 ± 33.53 | 65.75 ± 33.48 | 65.80 ± 33.57 | 65.79 ± 33.55 | 65.78 ± 33.56 | 65.81 ± 33.55 | 1.000 |
| Albumin | 36.48 ± 4.78 | 36.47 ± 4.81 | 36.48 ± 4.83 | 36.47 ± 4.77 | 36.49 ± 4.81 | 36.43 ± 4.84 | 1.000 |
| Hb/RDW-SD | 2.37 ± 0.58 | 2.36 ± 0.59 | 2.36 ± 0.59 | 2.36 ± 0.59 | 2.36 ± 0.59 | 2.36 ± 0.58 | 0.999 |
| Cystatin | 1.84 ± 0.95 | 1.84 ± 0.95 | 1.84 ± 0.95 | 1.84 ± 0.95 | 1.84 ± 0.95 | 1.84 ± 0.95 | 1.000 |
| WBC | 7.33 ± 3.54 | 7.28 ± 3.54 | 7.27 ± 3.55 | 7.28 ± 3.54 | 7.27 ± 3.55 | 7.28 ± 3.54 | 0.997 |
| RBC | 3.84 ± 0.77 | 3.83 ± 0.78 | 3.83 ± 0.78 | 3.83 ± 0.77 | 3.83 ± 0.77 | 3.84 ± 0.77 | 0.990 |
| MCV | 92.03 ± 8.78 | 92.03 ± 8.85 | 92.03 ± 8.85 | 92.03 ± 8.85 | 92.03 ± 8.84 | 92.03 ± 8.85 | 1.000 |
| MCH | 29.92 ± 3.41 | 29.92 ± 3.43 | 29.92 ± 3.43 | 29.92 ± 3.43 | 29.92 ± 3.43 | 29.92 ± 3.43 | 1.000 |
| MCHC | 324.69 ± 13.97 | 324.70 ± 13.98 | 324.70 ± 13.98 | 324.68 ± 13.98 | 324.68 ± 13.96 | 324.69 ± 13.97 | 1.000 |
| High sensitivity troponin | 0.19 ± 0.60 | 0.19 ± 0.59 | 0.19 ± 0.59 | 0.19 ± 0.59 | 0.19 ± 0.59 | 0.19 ± 0.59 | 1.000 |
| Potassium | 3.98 ± 0.68 | 3.98 ± 0.68 | 3.98 ± 0.68 | 3.98 ± 0.68 | 3.98 ± 0.68 | 3.98 ± 0.68 | 1.000 |
| Sodium | 138.36 ± 4.90 | 138.38 ± 4.91 | 138.37 ± 4.90 | 138.37 ± 4.90 | 138.38 ± 4.89 | 138.38 ± 4.89 | 1.000 |
| BNP | 1283.96 ± 1361.78 | 1292.98 ± 1524.54 | 1272.20 ± 1356.11 | 1281.94 ± 1372.81 | 1276.92 ± 1355.87 | 1275.17 ± 1360.72 | 0.998 |
| Alkaline phosphatase | 88.35 ± 37.52 | 87.98 ± 37.08 | 88.35 ± 37.21 | 87.89 ± 37.29 | 88.12 ± 37.23 | 87.61 ± 37.33 | 0.991 |
| Total bilirubin | 21.77 ± 14.60 | 21.73 ± 14.53 | 21.75 ± 14.57 | 21.77 ± 14.54 | 21.69 ± 14.59 | 21.71 ± 14.48 | 1.000 |
| HDL | 1.12 ± 0.35 | 1.12 ± 0.36 | 1.12 ± 0.36 | 1.11 ± 0.36 | 1.12 ± 0.36 | 1.12 ± 0.36 | 0.997 |
| Chloride | 101.98 ± 5.97 | 101.99 ± 5.99 | 101.99 ± 5.97 | 101.99 ± 5.97 | 102.00 ± 5.96 | 101.98 ± 5.96 | 1.000 |
| BMI | 21.24 ± 3.85 | 21.24 ± 3.85 | 21.24 ± 3.85 | 21.24 ± 3.85 | 21.24 ± 3.85 | 21.24 ± 3.85 | 1.000 |
| Occupation |  |  |  |  |  |  | 1.000 |
| Urban Resident | 1520 (84.87%) | 1542 (84.91%) | 1542 (84.91%) | 1543 (84.97%) | 1542 (84.91%) | 1542 (84.91%) |  |
| Farmer | 173 (9.66%) | 174 (9.58%) | 175 (9.64%) | 174 (9.58%) | 175 (9.64%) | 173 (9.53%) |  |
| Others | 98 (5.47%) | 100 (5.51%) | 99 (5.45%) | 99 (5.45%) | 99 (5.45%) | 101 (5.56%) |  |
| MSCKD |  |  |  |  |  |  | 1.000 |
| No | 1372 (75.63%) | 1373 (75.61%) | 1373 (75.61%) | 1373 (75.61%) | 1372 (75.55%) | 1372 (75.55%) |  |
| Yes | 442 (24.37%) | 443 (24.39%) | 443 (24.39%) | 443 (24.39%) | 444 (24.45%) | 444 (24.45%) |  |
| Age |  |  |  |  |  |  | 1.000 |
| ≥ 80 | 741 (40.80%) | 741 (40.80%) | 741 (40.80%) | 741 (40.80%) | 741 (40.80%) | 741 (40.80%) |  |
| 70-79 | 712 (39.21%) | 712 (39.21%) | 712 (39.21%) | 712 (39.21%) | 712 (39.21%) | 712 (39.21%) |  |
| 60-69 | 363 (19.99%) | 363 (19.99%) | 363 (19.99%) | 363 (19.99%) | 363 (19.99%) | 363 (19.99%) |  |
| Gender |  |  |  |  |  |  | 1.000 |
| Female | 1082 (59.58%) | 1082 (59.58%) | 1082 (59.58%) | 1082 (59.58%) | 1082 (59.58%) | 1082 (59.58%) |  |
| Male | 734 (40.42%) | 734 (40.42%) | 734 (40.42%) | 734 (40.42%) | 734 (40.42%) | 734 (40.42%) |  |
| Type of HF |  |  |  |  |  |  | 1.000 |
| Both | 1345 (74.06%) | 1345 (74.06%) | 1345 (74.06%) | 1345 (74.06%) | 1345 (74.06%) | 1345 (74.06%) |  |
| Left | 427 (23.51%) | 427 (23.51%) | 427 (23.51%) | 427 (23.51%) | 427 (23.51%) | 427 (23.51%) |  |
| Right | 44 (2.42%) | 44 (2.42%) | 44 (2.42%) | 44 (2.42%) | 44 (2.42%) | 44 (2.42%) |  |
| Diabetes |  |  |  |  |  |  | 1.000 |
| No | 1391 (76.60%) | 1391 (76.60%) | 1391 (76.60%) | 1391 (76.60%) | 1391 (76.60%) | 1391 (76.60%) |  |
| Yes | 425 (23.40%) | 425 (23.40%) | 425 (23.40%) | 425 (23.40%) | 425 (23.40%) | 425 (23.40%) |  |
| NYHA class |  |  |  |  |  |  | 1.000 |
| III | 933 (51.38%) | 933 (51.38%) | 933 (51.38%) | 933 (51.38%) | 933 (51.38%) | 933 (51.38%) |  |
| IV | 562 (30.95%) | 562 (30.95%) | 562 (30.95%) | 562 (30.95%) | 562 (30.95%) | 562 (30.95%) |  |
| II | 321 (17.68%) | 321 (17.68%) | 321 (17.68%) | 321 (17.68%) | 321 (17.68%) | 321 (17.68%) |  |
| Myocardial infarction |  |  |  |  |  |  | 1.000 |
| No | 1677 (92.35%) | 1677 (92.35%) | 1677 (92.35%) | 1677 (92.35%) | 1677 (92.35%) | 1677 (92.35%) |  |
| Yes | 139 (7.65%) | 139 (7.65%) | 139 (7.65%) | 139 (7.65%) | 139 (7.65%) | 139 (7.65%) |  |
| Congestive HF |  |  |  |  |  |  | 1.000 |
| No | 128 (7.05%) | 128 (7.05%) | 128 (7.05%) | 128 (7.05%) | 128 (7.05%) | 128 (7.05%) |  |
| Yes | 1688 (92.95%) | 1688 (92.95%) | 1688 (92.95%) | 1688 (92.95%) | 1688 (92.95%) | 1688 (92.95%) |  |
| Peripheral vascular disease |  |  |  |  |  |  | 1.000 |
| No | 1716 (94.49%) | 1716 (94.49%) | 1716 (94.49%) | 1716 (94.49%) | 1716 (94.49%) | 1716 (94.49%) |  |
| Yes | 100 (5.51%) | 100 (5.51%) | 100 (5.51%) | 100 (5.51%) | 100 (5.51%) | 100 (5.51%) |  |
| Cerebrovascular disease |  |  |  |  |  |  | 1.000 |
| No | 1680 (92.51%) | 1680 (92.51%) | 1680 (92.51%) | 1680 (92.51%) | 1680 (92.51%) | 1680 (92.51%) |  |
| Yes | 136 (7.49%) | 136 (7.49%) | 136 (7.49%) | 136 (7.49%) | 136 (7.49%) | 136 (7.49%) |  |
| COPD |  |  |  |  |  |  | 1.000 |
| No | 1595 (87.83%) | 1595 (87.83%) | 1595 (87.83%) | 1595 (87.83%) | 1595 (87.83%) | 1595 (87.83%) |  |
| Yes | 221 (12.17%) | 221 (12.17%) | 221 (12.17%) | 221 (12.17%) | 221 (12.17%) | 221 (12.17%) |  |
| Readmission within 3-month |  |  |  |  |  |  | 1.000 |
| No | 1358 (74.78%) | 1358 (74.78%) | 1358 (74.78%) | 1358 (74.78%) | 1358 (74.78%) | 1358 (74.78%) |  |
| Yes | 458 (25.22%) | 458 (25.22%) | 458 (25.22%) | 458 (25.22%) | 458 (25.22%) | 458 (25.22%) |  |

Results in table: Mean (SD) / n (%)

**Supplemental Table 6:** Comparison of raw data with data after multiple interpolation for multivariate analysis

| Model | Pre-imputation | Pro-imputation 1 | Pro-imputation 2 | Pro-imputation 3 | Pro-imputation 4 | Pro-imputation 5 | **MI combined effect value** |
| --- | --- | --- | --- | --- | --- | --- | --- |
| Crude model | 0.73 (0.61, 0.87) * | 0.75 (0.62, 0.89) * | 0.74 (0.62, 0.89) * | 0.73 (0.61, 0.88) * | 0.74 (0.62, 0.89) * | 0.74 (0.62, 0.89) * | 0.74(0.62,0.88) * |
| Model I | 0.74 (0.62, 0.89) * | 0.76 (0.63, 0.92) * | 0.76 (0.63, 0.91) * | 0.75 (0.62, 0.90) * | 0.76 (0.63, 0.91) * | 0.76 (0.63, 0.91) * | 0.76(0.64,0.90) * |
| Model II | 0.70 (0.55, 0.89) * | 0.72 (0.57, 0.89) * | 0.70 (0.56, 0.88) * | 0.69 (0.55, 0.87) * | 0.69 (0.55, 0.87) * | 0.70 (0.56, 0.88) * | 0.70(0.57,0.87) * |

Results in table: OR (95%CI) **P*<0.05

Crude model adjust for: None 
Model I adjust for: age; gender 
Model II adjust for: age; gender; occupation; MSCKD; SBP; DBP; type of HF; diabetes; creatinine; urea; GFR; albumin; potassium; sodium; BNP; total bilirubin; chloride; NYHA class, presence of LVEF.

*
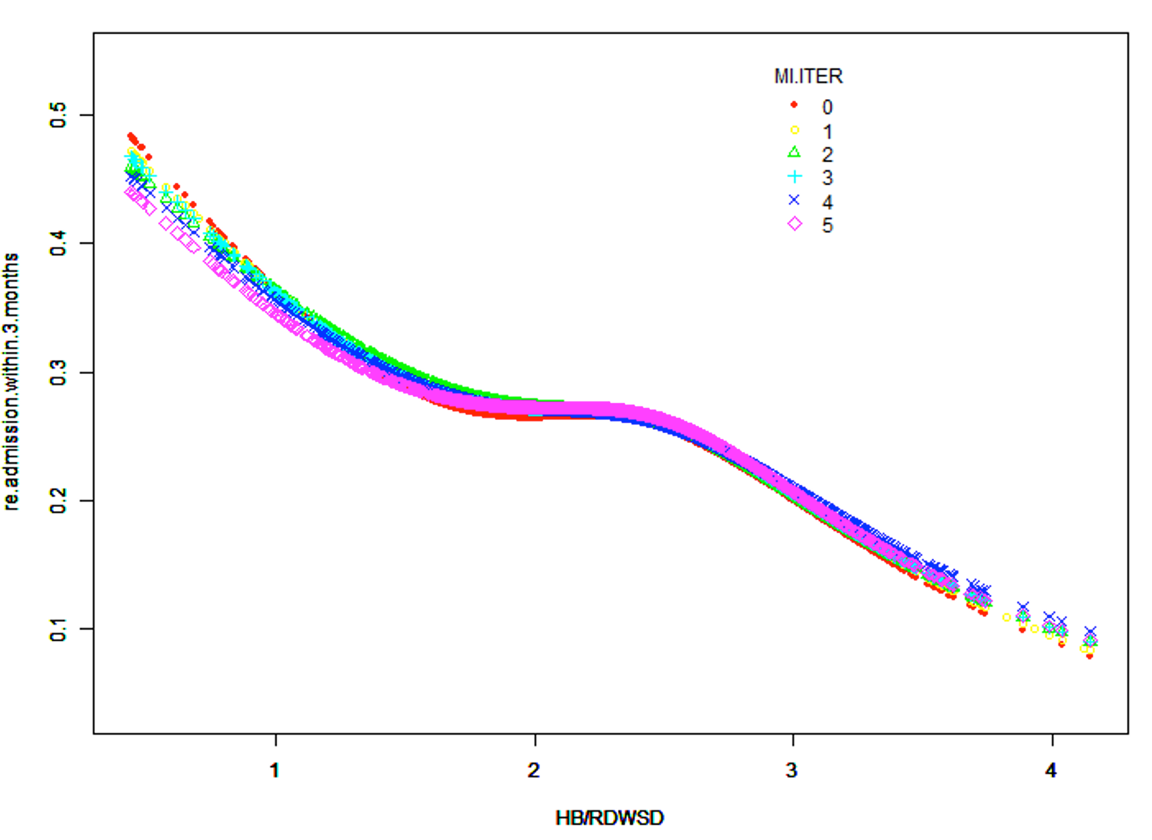
*

**Supplemental Figure 1:** Comparison of smoothed curves between the original

data (0) and the data after multiple interpolation (1-5).
